# Supplementary material
Source: Springer Nature journal article supplement (https://www.springermedizin.de/resource/supplementary/12876_2012_796_MOESM5_ESM.pdf/9437516)
Supplement: MOESM5 [file 9437516]

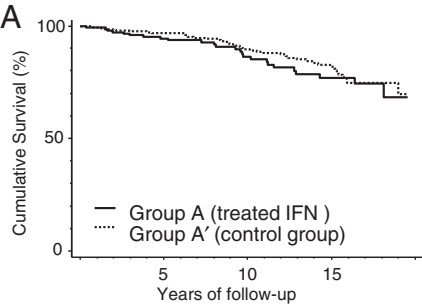

Patients at risk

|          |     |     |    |
|----------|-----|-----|----|
| Group A  | 125 | 75  | 44 |
| Group A' | 256 | 160 | 95 |

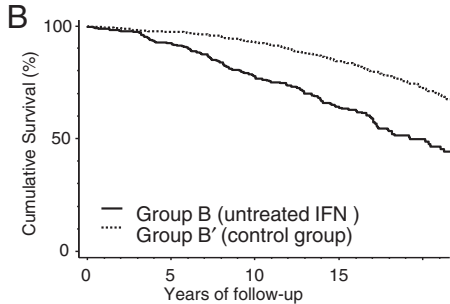

Patients at risk

|          |     |     |     |
|----------|-----|-----|-----|
| Group B  | 288 | 217 | 146 |
| Group B' | 634 | 555 | 411 |

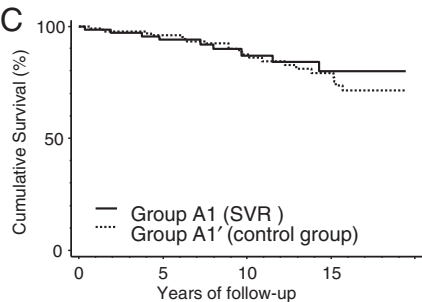

Patients at risk

|           |     |    |    |
|-----------|-----|----|----|
| Group A1  | 58  | 31 | 20 |
| Group A1' | 114 | 62 | 42 |

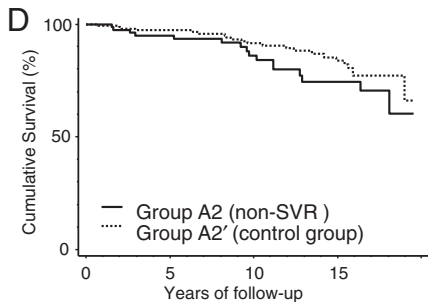

Patients at risk

|           |     |    |    |
|-----------|-----|----|----|
| Group A2  | 67  | 44 | 23 |
| Group A2' | 142 | 98 | 53 |
